# Supplementary material for: Friction law for atomic-scale contact assisted by atomistic simulations
Source: Research Square preprint supplement (doi:10.21203/rs.3.rs-149656/v1), 2021-02-01
Supplement: Supplementary file 1 [file 70150d036e7fc0b578cd58ff.docx]

Supplementary Information for

Friction law for atomic-scale contact assisted by atomistic simulations

Yang Wang1, 2, Jingxiang Xu1, 3, Yusuke Ootani1, Nobuki Ozawa1, Koshi Adachi2,

and Momoji Kubo1, 4*

1 Institute for Materials Research, Tohoku University, 2-1-1 Katahira, Aoba-ku, Sendai 980-8577, Japan

2 Department of Mechanical System Engineering, Graduate School of Engineering, Tohoku University, 6-6-01 Aoba, Aramaki, Aoba-ku, Sendai 980-8579, Japan

3 College of Engineering Science and Technology, Shanghai Ocean University, 999 Hucheng Ring Road, Pudong, Shanghai 201306, China

4 New Industry Creation Hatchery Center, Tohoku University, 6-6-10, Aoba, Aramaki, Aoba-ku, Sendai 980-8579, Japan.

**Text S1 Simulation details.**

Here large-scale reactive MD simulations are performed by using our originally developed simulator, LASKYO1, with the potential of reactive force field (ReaxFF)2,3. ReaxFF is a bond-order-based potential so that it is able to describe the bond formation and dissociation very well if the well-trained parameters are used. The presently used ReaxFF parameter set for H/C system was developed and reported in our previous work4. This developed parameter set are able to describe very well not only the chemical reactions for hydrogen and carbon system4 but also the mechanical properties of DLC with various hydrogen concentrations5. For the analysis, we use a bond order cutoff of 0.5 to calculate whether the bond between two atoms exists or not. In the friction simulations, the velocity-Verlet algorithm6,7 is employed to evolve the system with a time step of 0.25 fs/step. Berendsen thermostat is used to control the substrate temperature. For the DLC, the DLC with contains about 60% sp3- and 40% sp2-hybridized carbon atoms in the bulk. Both DLC substrates have rough surfaces: the root-mean-squared roughness for the upper and lower substrate is 5.14 and 5.55 Å, respectively. Before the friction simulation, DLC substrates are relaxed in a hydrogen gas to passivate the surfaces by hydrogen termination. The other details regarding the DLC and simulation model can be found in our previous work8.

**Text S2 Discussion on surface temperature.**

During the sliding simulation, frictional heat at the friction interface causes a raise of surface temperature, as typically shown in Fig. 1B in manuscript. Fig. S1 shows the time evolution of the instantaneous surface temperature under three different substrate temperatures (50, 300, and 600 K). For each simulation, we observe that the instantaneous surface temperature increases suddenly at the beginning 20 ps and then goes to a plateau. The used in the manuscript indicates the average of instantaneous surface temperature from 200 to 300 ps.

Additionally, we mentioned in the manuscript that would be affected by not only the substrate temperature () but also the applied normal force () and sliding velocity (). Fig. S2A and S2B show the measured as a function of (with constant = 300 K and = 100 m/s) and (with constant = 300 K and = 675 nN), respectively. For both, the measured increases with the increasing and , which is a comprehensible behavior because the increase of both and will bring higher frictional heat into the surface resulting in an increase of surface temperature.

**Text S3 Discussion on .**

As discussed in manuscript briefly, the terms of , , , and can be directly computed if the material type and surface morphology are known; however, the , as a fitting parameter, should be obtained by comparing with the simulation results. For the DLC used in this work, we have measured that = 280 GPa, = 7.104 Å2, and = 6.678 Å3, as reported previously8. Thus, the most important problem is to determine the . In fact, depends on not only the materials properties but also the surface morphology. In this work, since both substrates contain the self-affine roughness, should show a linear dependence on , that is, where the pre-factor can be calculated according to Persson’s theory9. Thus, if the relation of is substituted into afore expression, we have,

which is the final expression of for the rough-surface contact of DLC.

In addition, we should notice that, the in above equation indicates the actual temperature of real contacting surface () rather than the substrate temperature () or environmental temperature. Fig. 2B in manuscript has shown that above equation with = is able to well reproduce the MD results. However, if = is used, as shown in the following Fig. S3, above equation cannot fit with the MD data whatever even though the value of is varied from 0.01 to 0.08 eV.

**Text S4 Discussion on.**

Above equation is from the PT model. Apparently the critical force, , indicates the lateral force of an interfacial bonding atom when = 0 K. indicates the measurement of potential curve corrugation on contact surface, which could be calculated by where is the lattice constant.10 Here for DLC, we make = 3.567 Å which is the lattice constant of diamond. Then, is given by according to Ref.11, where is stress-free attempt rate and is the lateral contact stiffness. Here, since the direct calculation of and are difficult, is regarded as a fitting parameter as same as , which are needed to be determined by fitting with the simulation results.

**Text S5 Discussion on the limitation of this work.**

As is briefly discussed in manuscript, the presently proposed method to prediction friction may be failed in the system in which non-bonding adhesive interactions play dominant role (e.g. 2D materials and ultra-smooth surface at atomic-scale). This is easy to be understood because the basic assumption of Eq. 1 in manuscript is the omission of weak adhesive interactions such as van der Waals.

Besides, we also mention that Eq. 1-3 may be failed to predict friction under the extreme external conditions of temperature, applied load, and sliding velocity. For the temperature, in the ultra-low temperature regime, the reaction of interfacial bond formation is very difficult to occur, and hence the friction would be dominated by the non-bonding interactions, resulting in a failure of Eq. 1. As an opposite, in the ultra-high temperature regime, it is possible that high temperature could significantly change the material structures and mechanical properties (e.g. decrease of Young’s modulus), so that we cannot use the original material properties and extracted parameters ( in Eq. 2 and and in Eq. 3) to predict the friction. As an extreme example, if the surface temperature is high enough to melt the surface, surely, the existence of interfacial bond would not change the friction force so much. For the load, similar to the case of ultra-low temperature, interfacial bonds will not exist under the ultra-low load, so that non-bonding interactions dominate the friction behavior; however, in the case of ultra-high load, the ultra-high load would lead to a plastic deformation of surface rather than elastic deformation, and hence the friction force induced by plastic flow of material becomes very important, leading to the failure of Eq. 1. Lastly, for the sliding velocity, this limitation is easy to understand because PT model itself (Eq. 3) is not available for the case of extremely high and low sliding velocities, as discussed previously in details12.


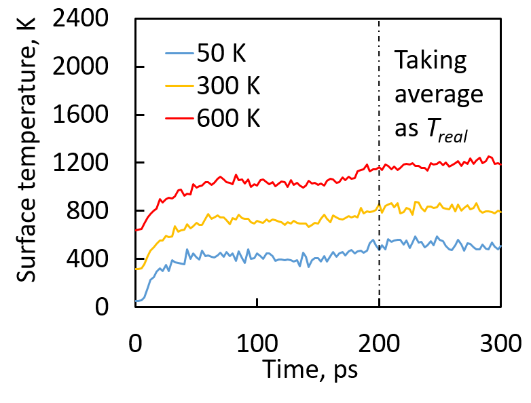


**Fig. S1** Time evolution of instantaneous surface temperature in MD simulations.

**
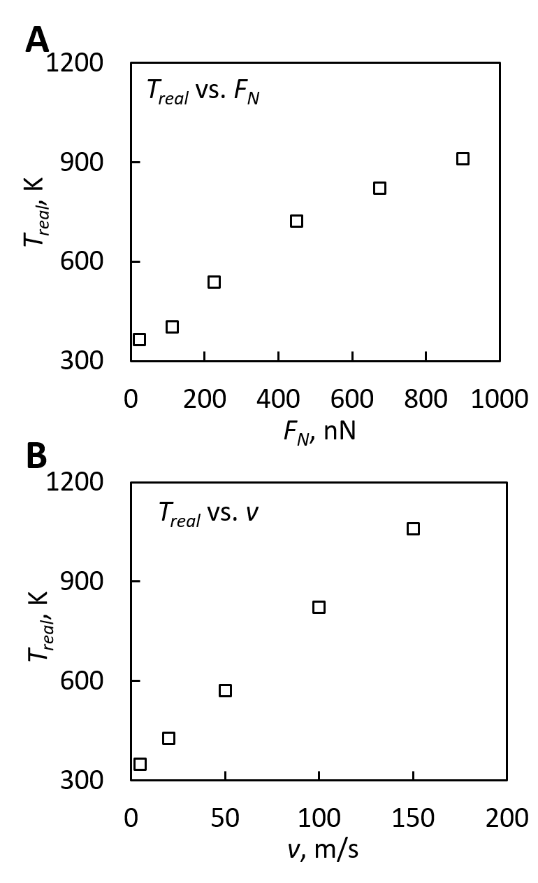
**

**Fig. S2** Load and velocity dependence of surface temperature measured from MD simulations. (**A**) as a function of when = 300 K and = 100 m/s. (**B**) as a function of when = 300 K and = 675 nN.

**
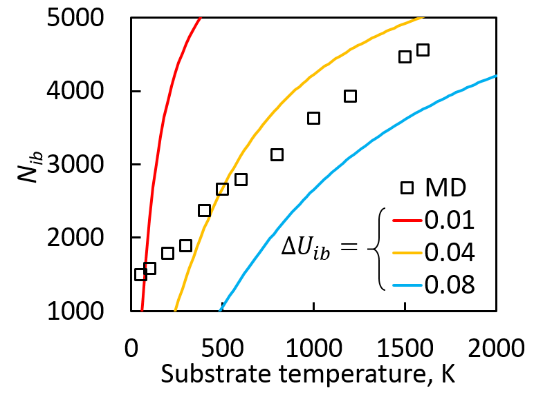
**

**Fig. S3.**  as a function of substrate temperature (). Black open squares are MD simulation results while solid lines are results by Eq. 2.

**Reference**

1. Xu, J. *et al.* Parallel large-scale molecular dynamics simulation opens new perspective to clarify the effect of a porous structure on the sintering process of Ni/YSZ multiparticles. *ACS Appl. Mater. Interfaces* **9**, 31816–31824 (2017).

2. Duin, A. C. T. van, Dasgupta, S. & Lorant, F. ReaxFF: A reactive force field for hydrocarbons. *J. Phys. Chem. A* **105**, 9396–9409 (2001).

3. Senftle, T. P. *et al.* The ReaxFF reactive force-field: Development, applications and future directions. *npj Comput. Mater.* **2**, 15011 (2016).

4. Wang, Y. *et al.* Triboemission of hydrocarbon molecules from diamond-like carbon friction interface induces atomic-scale wear. *Sci. Adv.* **5**, eaax9301 (2019).

5. Xu, J. *et al.* Prediction of macroscopic properties of diamond-like carbon from atomic-scale structure. *J. Phys. Chem. C* **123**, 24609–24614 (2019).

6. Verlet, L. Computer ‘experiments’on classical fluids. I. thermodynamical properties of Lennard-Jones molecules. *Phys. Rev.* **159**, 98–103 (1967).

7. Verlet, L. Computer ‘experiments’ on classical fluids. II. equilibrium correlation functions. *Phys. Rev.* **165**, 201–214 (1968).

8. Wang, Y. *et al.* Non-empirical law for nanoscale atom-by-atom wear. *Adv. Sci.* **7**, 2002827 (2020).

9. Persson, B. N. J. & Tosatti, E. The effect of surface roughness on the adhesion of elastic solids. *J. Chem. Phys.* **115**, 5597–5610 (2001).

10. Liu, X. Z. *et al.* Dynamics of atomic stick-slip friction examined with atomic force microscopy and atomistic simulations at overlapping speeds. *Phys. Rev. Lett.* **114**, 146102 (2015).

11. Jansen, L., Hölscher, H., Fuchs, H. & Schirmeisen, A. Temperature dependence of atomic-scale stick-slip friction. *Phys. Rev. Lett.* **104**, 256101 (2010).

12. Müser, M. H. Velocity dependence of kinetic friction in the Prandtl-Tomlinson model. *Phys. Rev. B* **84**, 125419 (2011).
